# Supplementary material for: Nucleation and growth of (10¯11) semi-polar AlN on (0001) AlN by Hydride Vapor Phase Epitaxy
Source: PubMed Central journal article supplement (PMC4877591; doi:10.1038/srep26040), 2016-05-17
Supplement: srep26040-s1.pdf [file srep26040-s1.pdf]

# **Nucleation and growth of $(10\bar{1}1)$ semi-polar AlN on $(0001)$ AlN by Hydride Vapor Phase Epitaxy**

**Ting Liu<sup>1</sup> , Jicai Zhang<sup>1,2</sup> \* , Xujun Su<sup>1</sup> , Jun Huang<sup>1</sup> , Jianfeng Wang<sup>1,2</sup> , & Ke Xu<sup>1,2\*</sup>**

<sup>1</sup>Platform for Characterization and Test, Suzhou Institute of Nano-tech and Nano-bionics, CAS, Suzhou, 215123, China.

<sup>2</sup> Suzhou Nanowin Science and Technology Co., Lt/d, Suzhou, 215123, China.

\*jczhang2010@sinano.ac.cn, kxu2006@sinano.ac.cn

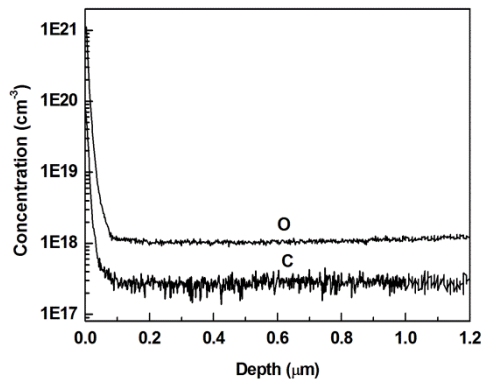

**Supplementary Fig. S1** The result of SIMS shows the concentrations of oxygen and carbon are around  $3 \times 10^{17}$  and  $1 \times 10^{18} \text{ cm}^{-3}$ , respectively.

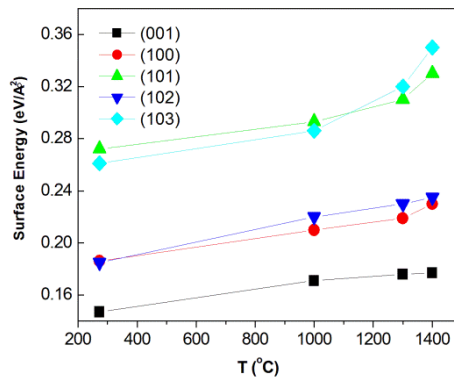

**Supplementary Fig. S2** The surface energy of a certain plane as a function of temperature.
